# Supplementary material for: REL-1017 (Esmethadone) as Adjunctive Treatment in Patients With Major Depressive Disorder: A Phase 2a Randomized Double-Blind Trial
Source: Atypon-hosted journal article supplement (doi:10.1176/appi.ajp.2021.21020197), 2021-12-22
Supplement: ajp_21020197_correction01.pdf [file ajp_21020197_correction01.pdf]

## **Correction to Fava et al.**

When the article “REL-1017 (Esmethadone) as Adjunctive Treatment in Patients With Major Depressive Disorder: A Phase 2a Randomized Double-Blind Trial” (doi: 10.1176/appi.ajp.2021.21020197) by Maurizio Fava, M.D., et al. was published online on December 22, 2021, one author, Gina R. DiGuglielmo, B.S., was left off the byline. The author’s name, affiliations, and financial disclosures were included when the article was published in print and online in the February 2022 issue.
