# Supplementary material for: REL-1017 (Esmethadone) as Adjunctive Treatment in Patients With Major Depressive Disorder: A Phase 2a Randomized Double-Blind Trial
Source: Atypon-hosted journal article supplement (doi:10.1176/appi.ajp.2021.21020197), 2021-12-22
Supplement: appi.ajp.2021.21020197.ds001.pdf [file appi.ajp.2021.21020197.ds001.pdf]

 


Psychiatry Online
